# Supplementary material
Source: PubMed Central journal article supplement (PMC2889603)

A

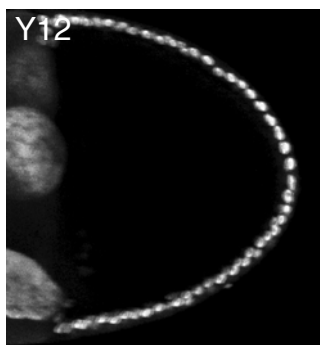

- ProtK

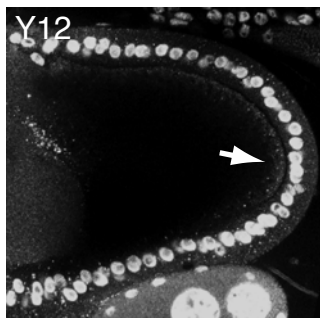

+ ProtK

B

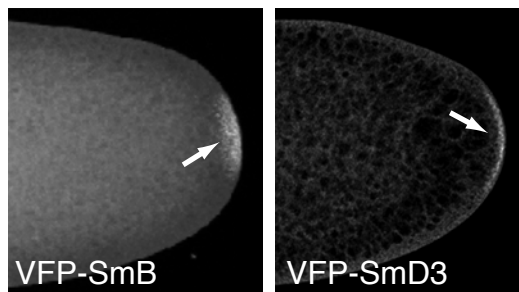

C

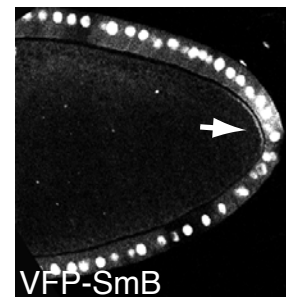

D

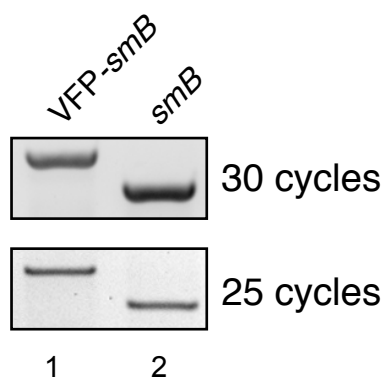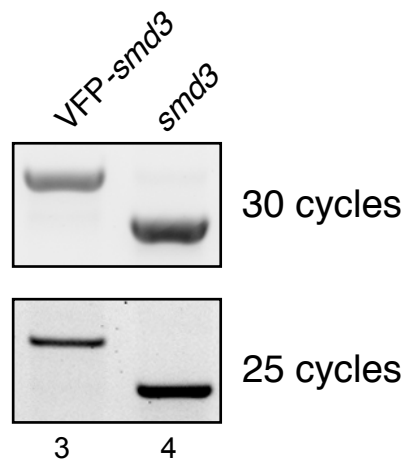

Supplement: supp_137.14.2341_042721FigS1.pdf [file supp_137.14.2341_042721FigS1.pdf]

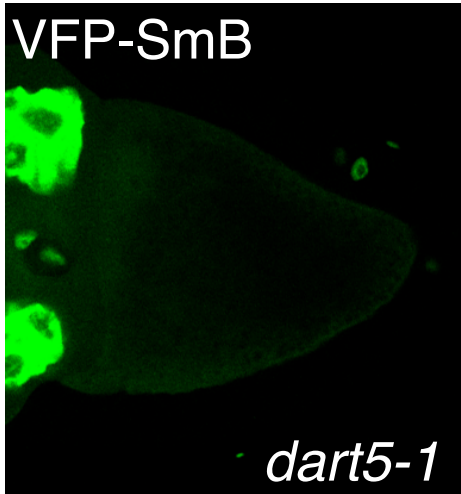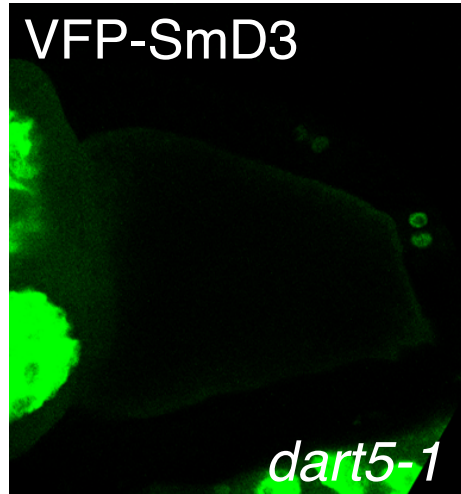

Supplement: supp_137.14.2341_042721FigS2.pdf [file supp_137.14.2341_042721FigS2.pdf]

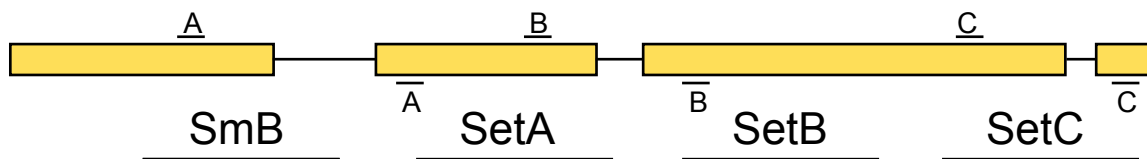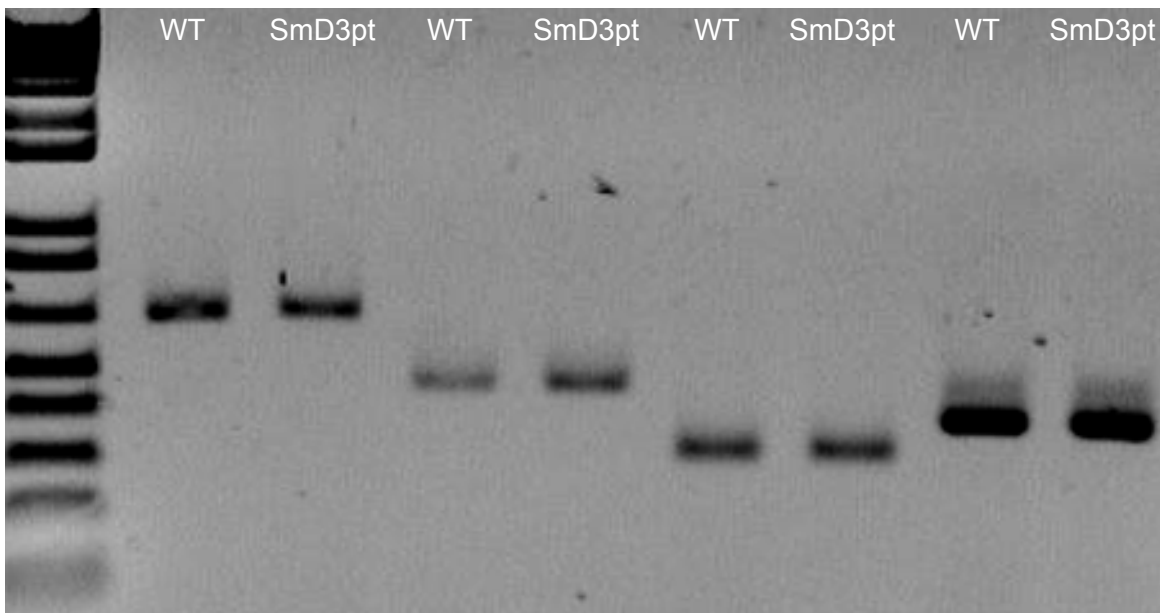

Supplement: supp_137.14.2341_042721FigS3.pdf [file supp_137.14.2341_042721FigS3.pdf]

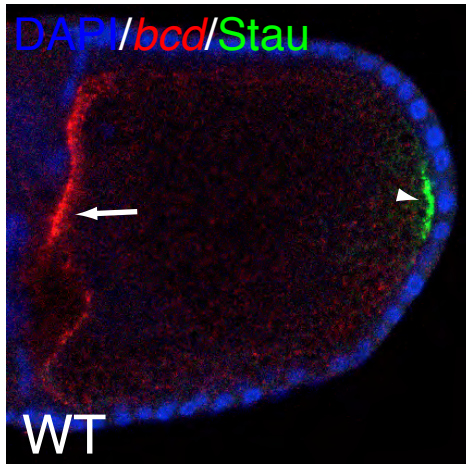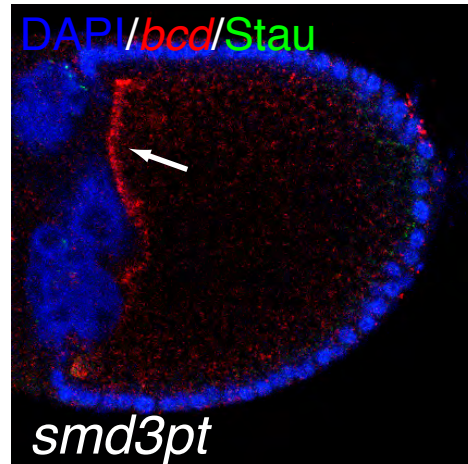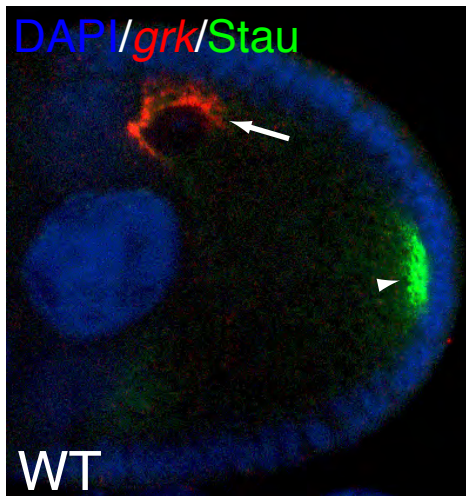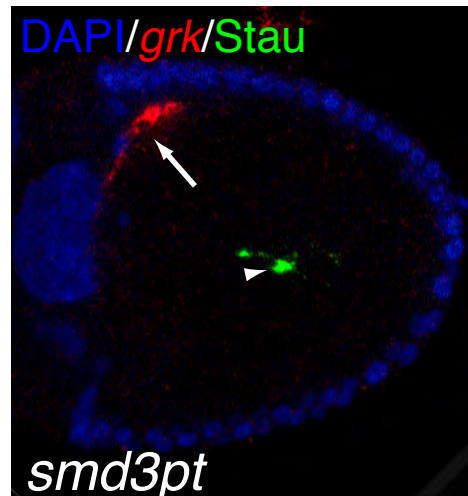

Supplement: supp_137.14.2341_042721FigS4.pdf [file supp_137.14.2341_042721FigS4.pdf]

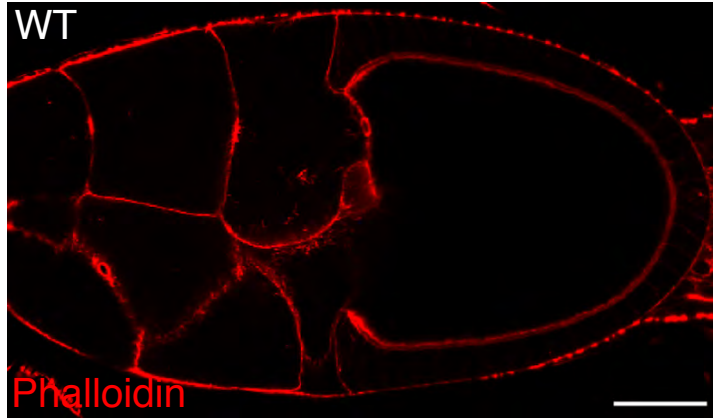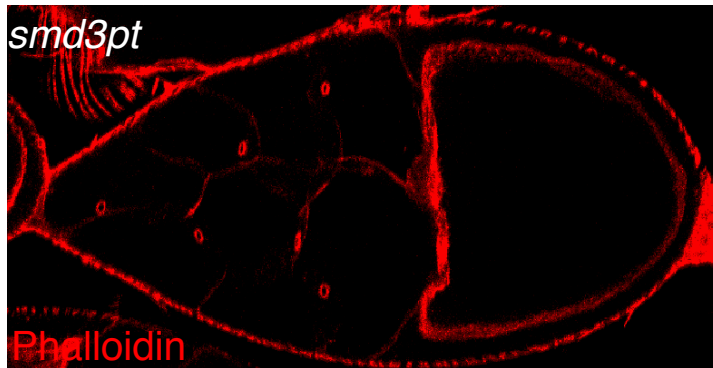

Supplement: supp_137.14.2341_042721FigS5.pdf [file supp_137.14.2341_042721FigS5.pdf]

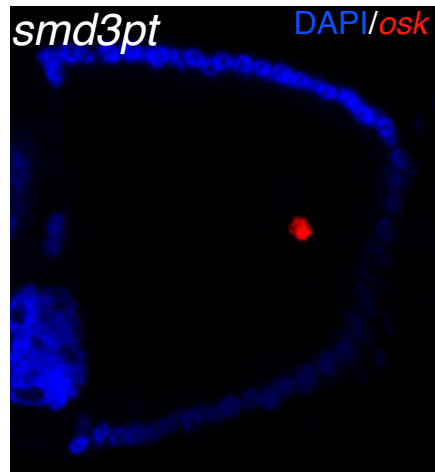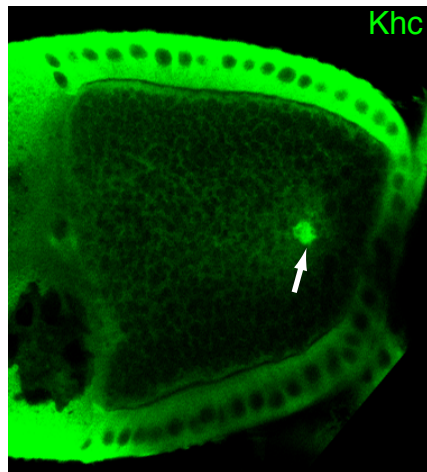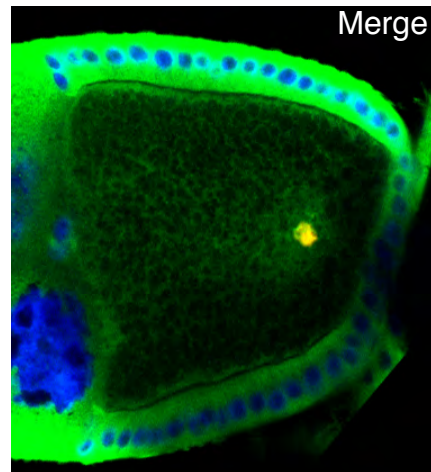

Supplement: supp_137.14.2341_042721FigS6.pdf [file supp_137.14.2341_042721FigS6.pdf]

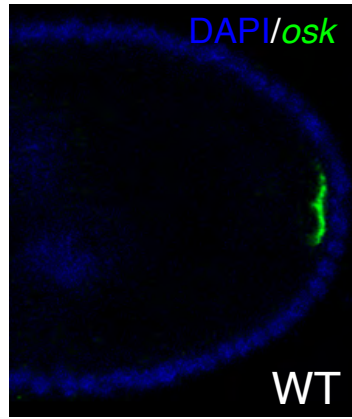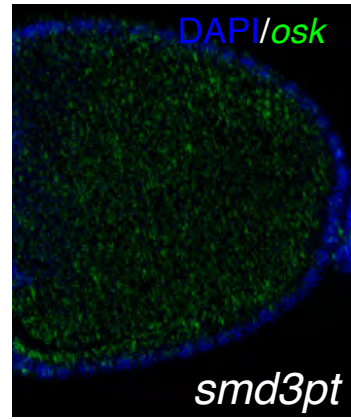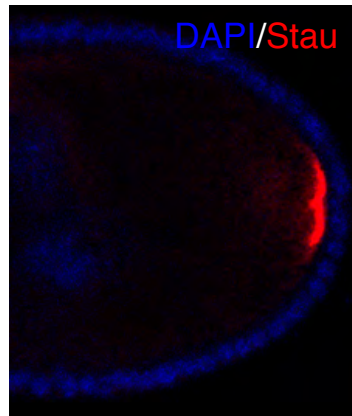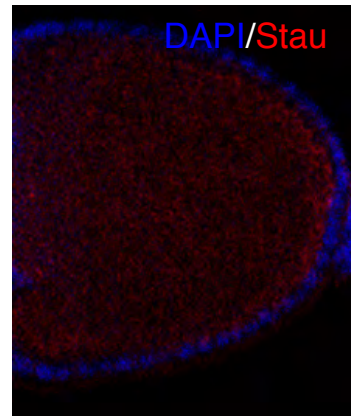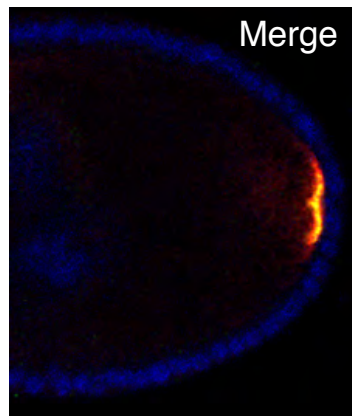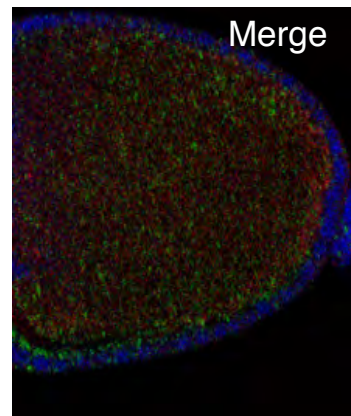

Supplement: supp_137.14.2341_042721FigS7.pdf [file supp_137.14.2341_042721FigS7.pdf]
